# Supplementary material for: Using molecular dynamics simulations to evaluate active designs of cephradine hydrolase by molecular mechanics/Poisson–Boltzmann surface area and molecular mechanics/generalized Born surface area methods
Source: Royal Society of Chemistry journal article supplement (doi:10.1039/c9ra02406a), 2019-01-01

# Supporting Information

**Using molecular dynamics simulations to evaluate active designs of cephradine hydrolase by molecular mechanics/Poisson Boltzmann surface area and molecular mechanics/generalized Born surface area methods**

Jing Xue<sup>1</sup>, Xiaoqiang Huang<sup>1</sup>, Yushan Zhu<sup>1,2,\*</sup>

<sup>1</sup>Department of Chemical Engineering, Tsinghua University, Beijing 100084, China

<sup>2</sup>MOE Key Lab for Industrial Biocatalysis, Tsinghua University, Beijing 100084, China

\*Corresponding author. E-mail: yszhu@tsinghua.edu.cn.

**Table S1 Catalytic geometrical constraints for TS**

| Site pair     | Type     | Atom1 | Atom2 <sup>a</sup> | Atom3 <sup>a</sup> | Atom4 <sup>a</sup> | Min <sup>b</sup> | Max <sup>b</sup> |
|---------------|----------|-------|--------------------|--------------------|--------------------|------------------|------------------|
| Ser117-TS     | Distance | OG    | #C15               |                    |                    | 1.4              | 1.6              |
|               | Angle    | CB    | OG                 | #C15               |                    | 100.0            | 120.0            |
|               | Angle    | OG    | #C15               | #O16               |                    | 100.0            | 120.0            |
|               | Torsion  | OG    | #O16               | #C15               | #N14               | 100.0            | 140.0            |
| Tyr118- TS    | Distance | N     | #O16               |                    |                    | 2.6              | 3.0              |
|               | Angle    | N     | HN                 | #O16               |                    | 140.0            | 180.0            |
|               | Angle    | HN    | #O16               | #C15               |                    | 80.0             | 140.0            |
| Tyr44- TS     | Distance | OH    | #O16               |                    |                    | 2.6              | 3.0              |
|               | Angle    | OH    | HH                 | #O16               |                    | 140.0            | 180.0            |
|               | Angle    | HH    | #O16               | #C15               |                    | 80.0             | 140.0            |
| His287-Ser117 | Distance | NE2   | #OG                |                    |                    | 2.6              | 3.0              |
|               | Angle    | NE2   | #HG1               | #OG                |                    | 140.0            | 180.0            |
|               | Angle    | CE1   | NE2                | #HG1               |                    | 90.0             | 150.0            |
| Asp259-His287 | Distance | OD1   | #ND1               |                    |                    | 2.6              | 3.0              |
|               | Angle    | CG    | OD1                | #HD1               |                    | 90.0             | 150.0            |
|               | Angle    | OD1   | #HD1               | #ND1               |                    | 140.0            | 180.0            |
| Asp259-His287 | Distance | OD2   | #ND1               |                    |                    | 2.6              | 3.0              |
|               | Angle    | CG    | OD2                | #HD2               |                    | 90.0             | 150.0            |
|               | Angle    | OD2   | #HD2               | #ND1               |                    | 140.0            | 180.0            |
| Phe261-Asp259 | Distance | N     | #OD2               |                    |                    | 2.6              | 3.2              |
|               | Angle    | HN    | #OD2               | #CG                |                    | 90.0             | 150.0            |
|               | Angle    | N     | HN                 | #OD2               |                    | 140.0            | 180.0            |
| Phe261-Asp259 | Distance | N     | #OD1               |                    |                    | 2.6              | 3.2              |
|               | Angle    | HN    | #OD1               | #CG                |                    | 90.0             | 150.0            |
|               | Angle    | N     | HN                 | #OD1               |                    | 140.0            | 180.0            |

<sup>a</sup>Atoms on the latter residue within a site pair are prefixed with ‘#’

<sup>b</sup>Distance measurements are given in Å. Angle and torsion measurements are given in degrees

**Table S2 Variation rules for generating TS library**

| Type     | Atom1 <sup>a</sup> | Atom2 <sup>a</sup> | Atom3 <sup>a</sup> | Atom4 | Min <sup>b</sup> | Max <sup>b</sup> | Step <sup>b</sup> |
|----------|--------------------|--------------------|--------------------|-------|------------------|------------------|-------------------|
| Distance | #OG                | C15                |                    |       | 1.4              | 1.6              | 0.1               |
| Angle    | #CB                | #OG                | C15                |       | 105.0            | 115.0            | 5.0               |
| Torsion  | #CA                | #CB                | #OG                | C15   | -180.0           | 179.0            | 10.0              |
| Angle    | #OG                | C15                | O16                |       | 105.0            | 115.0            | 5.0               |
| Torsion  | #OG                | O16                | C15                | N14   | 120.0            | 120.0            | 0.0               |
| Torsion  | #OG                | O16                | C15                | C17   | -120.0           | -120.0           | 0.0               |
| Torsion  | #CB                | #OG                | C15                | O16   | -180.0           | 179.0            | 10.0              |
| Torsion  | N14                | C15                | C17                | C18   | -180.0           | 179.0            | 10.0              |
| Torsion  | C15                | C17                | C18                | C19   | -180.0           | 179.0            | 10.0              |
| Torsion  | O16                | C15                | N14                | C7    | -180.0           | 179.0            | 10.0              |
| Torsion  | C15                | N14                | C7                 | C8    | -180.0           | 179.0            | 10.0              |

<sup>a</sup>Atoms on anchor residue Ser117 are prefixed with '#'

<sup>b</sup>Distance measurements are given in Å. Angle and torsion measurements are given in degrees.

**Table S3 Catalytic geometrical constraints for ES**

| Site pair     | Type     | Atom1 | Atom2 <sup>a</sup> | Atom3 <sup>a</sup> | Atom4 <sup>a</sup> | Min <sup>b</sup> | Max <sup>b</sup> |
|---------------|----------|-------|--------------------|--------------------|--------------------|------------------|------------------|
| Ser117-ES     | Distance | OG    | #C15               |                    |                    | 2.9              | 3.1              |
| Tyr118- ES    | Distance | N     | #O16               |                    |                    | 2.6              | 3.0              |
|               | Angle    | N     | HN                 | #O16               |                    | 140.0            | 180.0            |
|               | Angle    | HN    | #O16               | #C15               |                    | 80.0             | 140.0            |
| Tyr44- ES     | Distance | OH    | #O16               |                    |                    | 2.6              | 3.0              |
|               | Angle    | OH    | HH                 | #O16               |                    | 140.0            | 180.0            |
|               | Angle    | HH    | #O16               | #C15               |                    | 80.0             | 140.0            |
| His287-Ser117 | Distance | NE2   | #OG                |                    |                    | 2.6              | 3.0              |
|               | Angle    | NE2   | #HG1               | #OG                |                    | 140.0            | 180.0            |
|               | Angle    | CE1   | NE2                | #HG1               |                    | 90.0             | 150.0            |
| Asp259-His287 | Distance | OD1   | #ND1               |                    |                    | 2.6              | 3.0              |
|               | Angle    | CG    | OD1                | #HD1               |                    | 90.0             | 150.0            |
|               | Angle    | OD1   | #HD1               | #ND1               |                    | 140.0            | 180.0            |
| Asp259-His287 | Distance | OD2   | #ND1               |                    |                    | 2.6              | 3.0              |
|               | Angle    | CG    | OD2                | #HD2               |                    | 90.0             | 150.0            |
|               | Angle    | OD2   | #HD2               | #ND1               |                    | 140.0            | 180.0            |
| Phe261-Asp259 | Distance | N     | #OD2               |                    |                    | 2.6              | 3.2              |
|               | Angle    | HN    | #OD2               | #CG                |                    | 90.0             | 150.0            |
|               | Angle    | N     | HN                 | #OD2               |                    | 140.0            | 180.0            |
| Phe261-Asp259 | Distance | N     | #OD1               |                    |                    | 2.6              | 3.2              |
|               | Angle    | HN    | #OD1               | #CG                |                    | 90.0             | 150.0            |
|               | Angle    | N     | HN                 | #OD1               |                    | 140.0            | 180.0            |

<sup>a</sup>Atoms on the latter residue within a site pair are prefixed with ‘#’

<sup>b</sup>Distance measurements are given in Å. Angle and torsion measurements are given in degrees

**Table S4 Variation rules for generating ES library**

| Type     | Atom1 <sup>a</sup> | Atom2 <sup>a</sup> | Atom3 <sup>a</sup> | Atom4 | Min <sup>b</sup> | Max <sup>b</sup> | Step <sup>b</sup> |
|----------|--------------------|--------------------|--------------------|-------|------------------|------------------|-------------------|
| Distance | #OG                | C15                |                    |       | 2.9              | 3.1              | 0.1               |
| Angle    | #CB                | #OG                | C15                |       | 0.0              | 180.0            | 10.0              |
| Torsion  | #CA                | #CB                | #OG                | C15   | -180.0           | 179.0            | 10.0              |
| Angle    | #OG                | C15                | O16                |       | 0.0              | 180.0            | 10.0              |
| Torsion  | #OG                | O16                | C15                | N14   | 0.0              | 180.0            | 10.0              |
| Torsion  | #CB                | #OG                | C15                | O16   | -180.0           | 179.0            | 10.0              |
| Torsion  | N14                | C15                | C17                | C18   | -180.0           | 179.0            | 10.0              |
| Torsion  | C15                | C17                | C18                | C19   | -180.0           | 179.0            | 10.0              |
| Torsion  | O16                | C15                | N14                | C7    | -180.0           | 179.0            | 10.0              |
| Torsion  | C15                | N14                | C7                 | C8    | -180.0           | 179.0            | 10.0              |

<sup>a</sup>Atoms on anchor residue Ser117 are prefixed with '#'

<sup>b</sup>Distance measurements are given in Å. Angle and torsion measurements are given in degrees.

**Table S5 Results of t-test for fit between the experimental kinetic parameters and the calculated free energy changes.**

| Kinetic parameters                                   | Methods | $\epsilon_p$ | $R^2$  | t values | Critical t value (p=0.05) | Results |
|------------------------------------------------------|---------|--------------|--------|----------|---------------------------|---------|
| $K_m \sim \Delta G_{\text{bind}}$                    | MM/GBSA | 1            | 0.7053 | 4.892    | 2.228                     | passed  |
|                                                      | MM/PBSA | 1            | 0.7531 | 5.523    |                           | passed  |
|                                                      | MM/PBSA | 4            | 0.7728 | 5.831    |                           | passed  |
|                                                      | MM/PBSA | 24           | 0.6784 | 4.593    |                           | passed  |
| $k_{\text{cat}}/K_m \sim \Delta G^\ddagger$          | MM/GBSA | 1            | 0.1095 | 1.109    |                           | failed  |
|                                                      | MM/PBSA | 1            | 0.1609 | 1.385    |                           | failed  |
|                                                      | MM/PBSA | 4            | 0.5001 | 3.163    |                           | passed  |
|                                                      | MM/PBSA | 24           | 0.5005 | 3.166    |                           | passed  |
| $k_{\text{cat}} \sim \Delta G^\ddagger_{\text{cat}}$ | MM/GBSA | 1            | 0.2509 | 1.830    |                           | failed  |
|                                                      | MM/PBSA | 1            | 0.0914 | 1.003    |                           | failed  |
|                                                      | MM/PBSA | 4            | 0.2426 | 1.789    |                           | failed  |
|                                                      | MM/PBSA | 24           | 0.4724 | 2.992    |                           | passed  |

Figure S1 The regression between the experimental turnover numbers and the predicted activation energies of WT and its eleven variants by MM/GBSA and MM/PBSA methods. The ordinate is scaled logarithmically, and the hypothetical coordination systems are shown in dashed lines with the WT as the origin. (A) MM/GBSA method; (B) MM/PBSA method based on  $\epsilon_p=1$ ; (C) MM/PBSA method based on  $\epsilon_p=4$ ; (D) MM/PBSA method based on  $\epsilon_p=24$ .

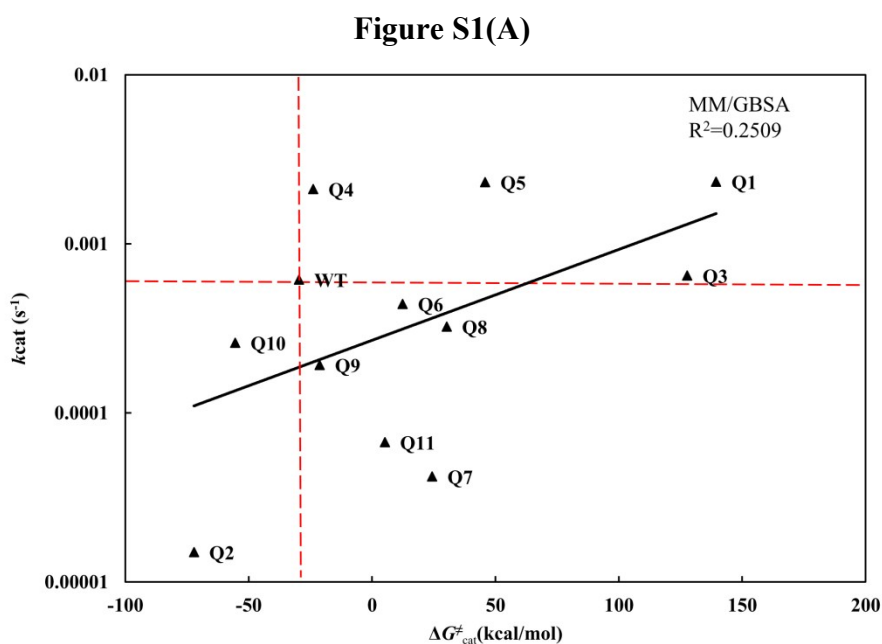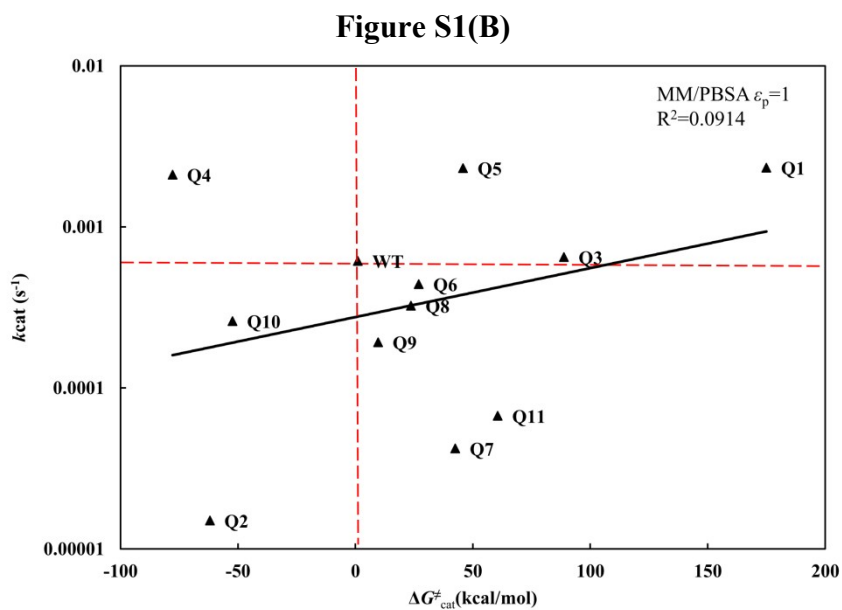

Figure S1(C)

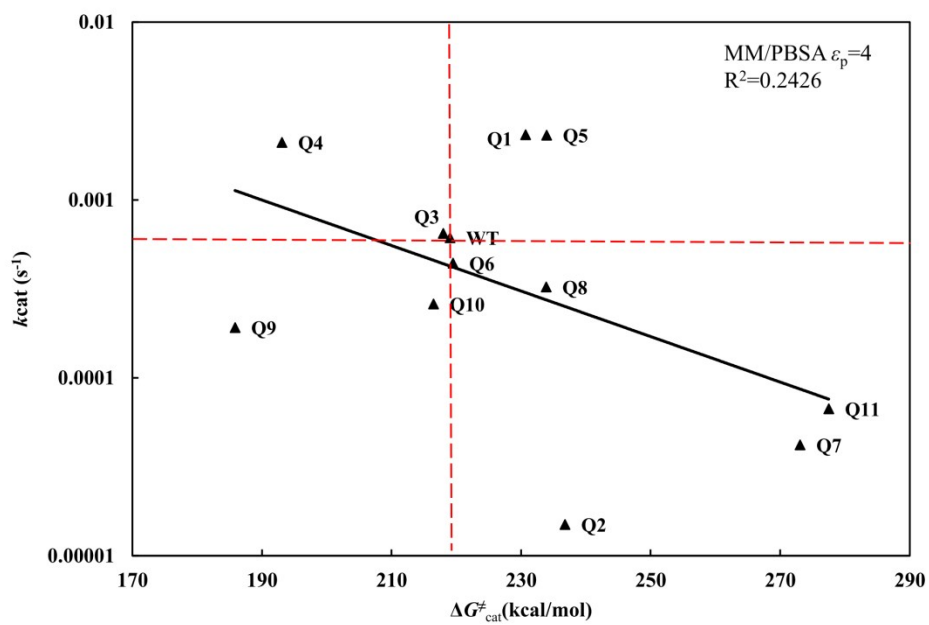

Figure S1(D)

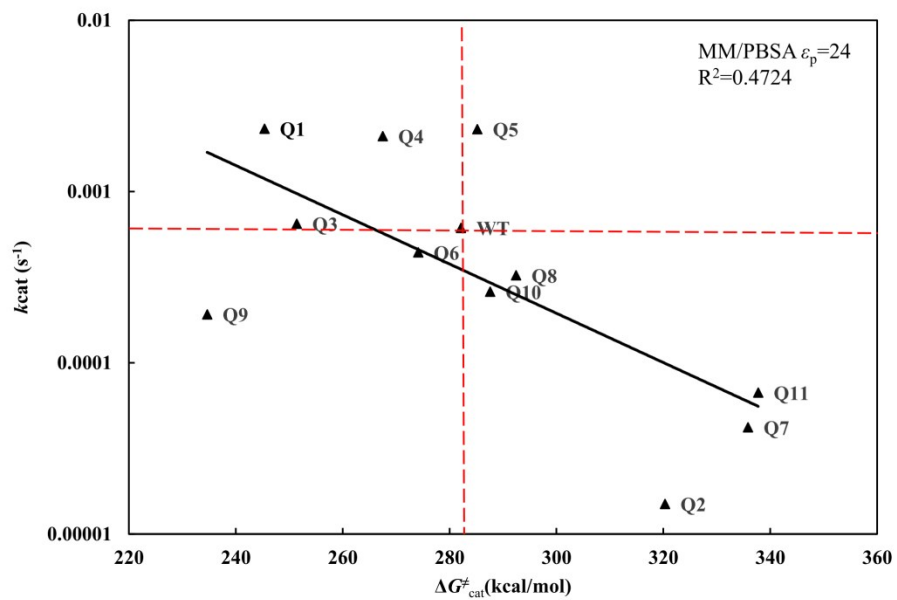



**Figure S2 System volume change for the wild type during 20 ns MD simulations.**

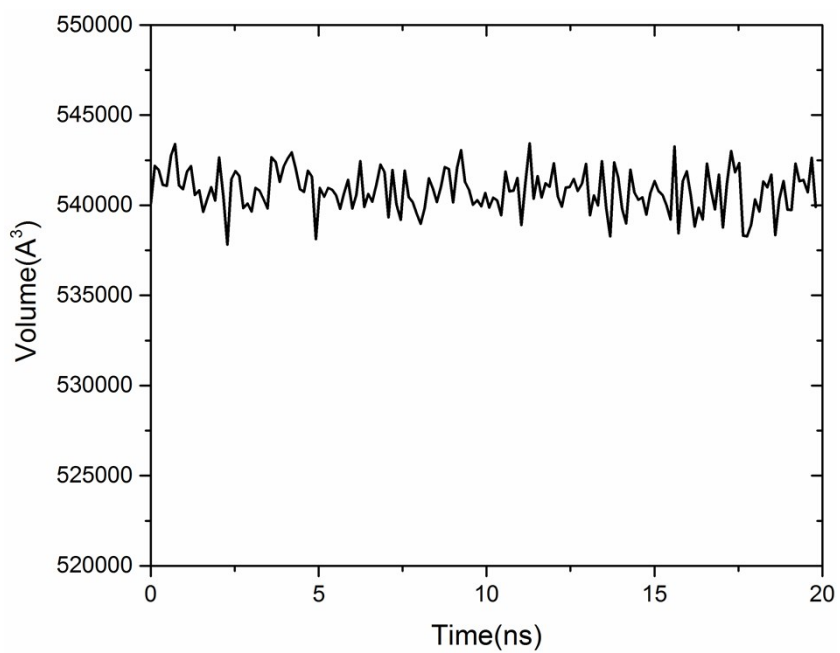

Supplement: c9ra02406a1.pdf [file c9ra02406a1.pdf]
